# Supplementary material for: A survey on common criteria (CC) evaluating schemes for security assessment of IT products
Source: PeerJ journal article supplement (doi:10.7717/peerj-cs.701), 2021-10-26
Supplement: Peerj__Acronyms_List_of_Activities_Processes__Tasks.pdf [file Peerj__Acronyms_List_of_Activities_Processes__Tasks.pdf]

## ACRONYMS

|                                                             |                  |
|-------------------------------------------------------------|------------------|
| Common Evaluation Methodology                               | CEM              |
| Denial of Service                                           | DoS              |
| Advanced Persistent Threats                                 | APT <sub>s</sub> |
| Evaluation Assurance Levels                                 | EAL <sub>s</sub> |
| Security Functional Requirements                            | SFR <sub>s</sub> |
| Protection Profile                                          | PP               |
| Multi Functional Peripherals                                | MFP <sub>s</sub> |
| Security Objectives                                         | SO <sub>s</sub>  |
| Collaborative Protection Profile                            | cPP              |
| Evaluation Technical Report                                 | ETR              |
| Target of Evaluation                                        | TOE              |
| Security Target                                             | ST               |
| Evaluation Consistency Review                               | ECR              |
| Validation Report                                           | VR               |
| Validation Oversight Reviews                                | VOR <sub>s</sub> |
| Check-In/Check-Out                                          | CICO             |
| Kick-Off                                                    | KO               |
| Initial Validation Oversight Review                         | IVOR             |
| Final Validation Oversight Review                           | FVOR             |
| Test Validation Oversight Review                            | TVOR             |
| Memorandum for the Record                                   | MR               |
| Impact Analysis Report                                      | IAR              |
| Evaluation Work Programme                                   | EWP              |
| Task Kick-off Meeting                                       | TKM              |
| Evaluation Progress Meeting                                 | EPM              |
| Assurance of ST Evaluation                                  | ASE              |
| Assurance of Vulnerability Analysis                         | AVA              |
| Assurance for Testing                                       | ATE              |
| Single Evaluation Report                                    | SER              |
| Review Report                                               | RR               |
| Observation Report                                          | OR               |
| Certification Report                                        | CR               |
| Assurance Continuity                                        | AC               |
| Request for Interpretation                                  | RI               |
| Industrial Enabling Services                                | IES              |
| Common Criteria documentation International Interpretations | IICC             |
| UK Interpretations                                          | UKI              |
| Certification Work Programme                                | CWP              |
| Certification Application Form                              | CAF              |
