# Supplementary material for: A survey on common criteria (CC) evaluating schemes for security assessment of IT products
Source: PeerJ journal article supplement (doi:10.7717/peerj-cs.701), 2021-10-26
Supplement: Peerj__Acronyms_List_of_Organizations__Standards.pdf [file Peerj__Acronyms_List_of_Organizations__Standards.pdf]

## ACRONYMS

|                                                                 |       |
|-----------------------------------------------------------------|-------|
| Information Technology                                          | IT    |
| Common Criteria                                                 | CC    |
| Information Systems                                             | IS    |
| United States                                                   | US    |
| United Kingdom                                                  | UK    |
| Universal Serial Bus                                            | USB   |
| Common Criteria Protection Profile                              | CCPP  |
| Internet of Things                                              | IoT   |
| Certification Body                                              | CB    |
| Global Cybersecurity Index                                      | GCI   |
| Common Criteria Recognition Arrangement                         | CCRA  |
| Commercial off-the-shelf                                        | COTS  |
| Common Criteria Testing Laboratory                              | CCTL  |
| Product Compliant List                                          | PCL   |
| Technical Committee                                             | TC    |
| Common Criteria Evaluation and Validation Scheme                | CCEVS |
| National Information Assurance Partnership                      | NIAP  |
| National Security Agency                                        | NSA   |
| National Institute of Standards and Technology                  | NIST  |
| National Voluntary Lab Accreditation Program                    | NVLAP |
| Technical Rapid Response Team                                   | TRRT  |
| Singapore Common Criteria Scheme                                | SCCS  |
| Cyber Security Agency of Singapore                              | CSA   |
| Singapore Accreditation Council                                 | SAC   |
| International Organization for Standardization                  | ISO   |
| Certified Product List                                          | CPL   |
| National Scheme Communication                                   | NSC   |
| Historical Product List                                         | HPL   |
| Netherlands Scheme for Certification in the Area of IT Security | NSCIB |
| Information Technology Security Evaluation Facility             | ITSEF |
| Commercial Evaluation Facilities                                | CLEFs |
| Scheme Information Notices                                      | SINs  |
| CESG Test Laboratory General Operational Requirements           | CGOR  |
| Point of Contact                                                | POC   |
| CLEF Progress Report                                            | CPR   |
| Information and Communication Technology                        | ICT   |
| Management Committee                                            | MC    |
| Executive Subcommittee                                          | ES    |
| Assurance Continuity Maintenance Report                         | ACMR  |
